# Supplementary material for: Exploration of exosomal microRNA expression profiles in pigeon ‘Milk’ during the lactation period
Source: PubMed Central journal article supplement (PMC6245878; doi:10.1186/s12864-018-5201-0), 2018-11-20
Supplement: 12864_2018_5201_MOESM3_ESM.pdf [file 12864_2018_5201_MOESM3_ESM.pdf]

A

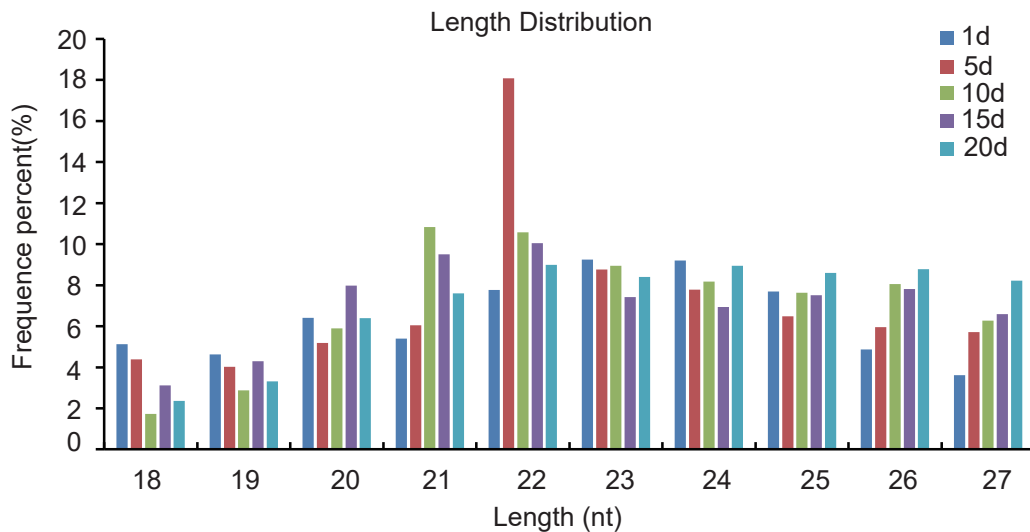

B

Normalized expression of conserved miRNAs

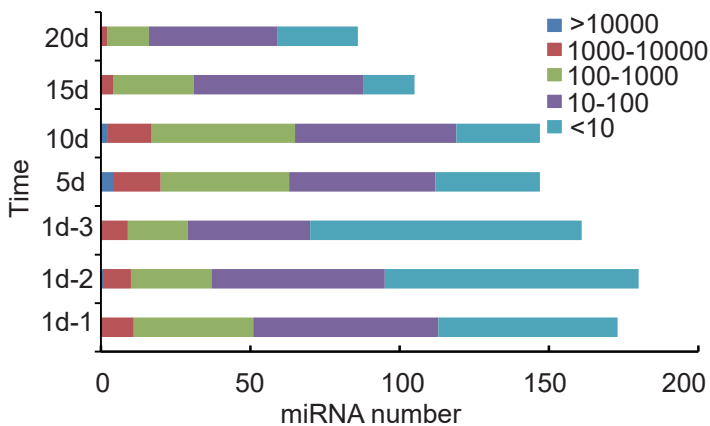

C

Normalized expression of novel miRNAs

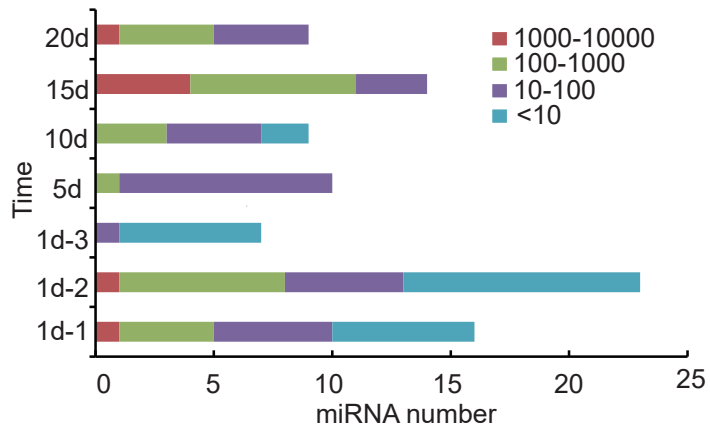

Figure S2. Length distribution and expression distribution of identified exosomal miRNAs in PM.
