# Supplementary material for: Exploration of exosomal microRNA expression profiles in pigeon ‘Milk’ during the lactation period
Source: BMC Genomics. 2018 Nov 20;19:828. doi: 10.1186/s12864-018-5201-0 (PMC6245878; doi:10.1186/s12864-018-5201-0)
Supplement: Supplementary file 2 — Table S1. The sequencing results. (XLSX 9 kb) [file 12864_2018_5201_MOESM2_ESM.xlsx]

## Sheet: Sheet1
Table S1 The sequencing results
Mapping_statis	1d-1	1d-2	1d-3	5d	10d	15d	20d
Raw Reads	12715576	14288726	13341298	13973545	13380836	14304029	13472035
Clean Reads	10204763	10658383	11918793	10547017	12892065	12658323	12340262
Mapped Reads	1555423	2805101	4132098	468388	347549	198210	285986
Unmapped Reads	8649340	7853282	7786695	10078629	12544516	12460113	12054276
Mapped Ratio (%)	15.2	26.3	34.7	4.4	2.7	1.6	2.3
Unmapped Ratio (%)	84.8	73.7	65.3	95.6	97.3	98.4	97.7
